# Supplementary material for: Unexpected features of stretched Si–H⋯Mo β-agostic interactions
Source: Royal Society of Chemistry journal article supplement (doi:10.1039/b315517j), 2004-01-01
Supplement: b315517j.doc [file b315517j.doc]

# Supporting Information

to the article “Unexpected Features of Stretched Si-H···Mo -Agostic Interactions”

by Stanislav K. Ignatov, Nicholas H. Rees, Stuart R. Dubberley, Alexei G. Razuvaev, Philip Mountford* and Georgii I. Nikonov*

*Experimental Section.* All manipulations were carried out using conventional Schlenk techniques. Solvents were dried over sodium or sodium benzophenone ketyl and distilled into the reaction vessel by high vacuum gas phase transfer. NMR spectra were recorded on a Varian Mercury-*vx* (1H, 300 MHz; 13C, 75.4 MHz) and Unity-plus (1H, 500 MHz; 13C, 125.7 MHz) spectrometers. IR spectra were obtained as Nujol mulls with a FTIR Perkin-Elmer 1600 series spectrometer. Silanes were obtained from Sigma-Aldrich. (Ar’N) 2Mo(PMe3)3 was prepared according to the literature method1.

**(Ar’N)(Ar’NSiMe2-H)Mo(PMe3)2(Cl) (7)**:

To a solution of (Ar’N) 2Mo(PMe3)3 (0.381 g, 0.677 mmol) in 40 mL of ether was added HSiClMe2 (0.25 mL, 2.25 mmol). In 5 min the color changed from dark-green to dark-brown. The solution concentrated to 15 mL and 15 mL of hexane was added, the mixture was placed in a freezer (-30 C) overnight to give dark well-defined crystals, which were isolated by filtration and drying in vacuo. Yield: 0.100 g. Two more crops were obtained by concentrating the solution and cooling to -30 C. Total yield: 0.277 g (0.477 mmol, 70 %).

IR (Nujol): Si-H = 1910 cm-1(weak). 1H NMR (500MHz, -40ºC, toluene-d8): 7.24 (d, *J* (H-H) = 7.4 Hz, 1, *m*-Ar’NSi), 7.10 (d, *J* (H-H) = 7.5 Hz, 1, *m*-Ar’NSi), 7.00 (t, *J* (H-H) = 7.4 Hz, 1, *p*-Ar’NSi), 6.83 (d, *J* (H-H) = 7.53Hz, 1, *m*-Ar’N), 6.78 (t, *J* (H-H) = 7.4 Hz, 1, *p*-Ar’N), 6.75 (d, *J* (H-H)= 7.6 Hz, 1, *m*-Ar’N), 2.85 (s, 3, Me-Ar’NSi), 2.49 (s, 3, Me-Ar’N), 2.07 (s, 3, Me-Ar’NSi), 2.06 (s, 3, Me-Ar’N), 1.68 (dqq, *J*  = 2.2 Hz , *J* = 1.7 Hz, *J* = 23.3 Hz, 1, MoH), 1.23 (d, *J* (P-H) = 7.1 Hz, 9, PMe3), 0.98 (d, *J* (P-H) = 8.5 Hz, 9, PMe3), 0.71 (d, *J* = 1.7 Hz, 3, SiMe), 0.25 (d, *J* = 2.2 Hz, 3. SiMe). 13C NMR (125.7MHz, -40ºC, toluene-d8): 158.22 (d, *J* (P-C) = 2.0 Hz, *i*-Ar’NSi), 154.45 (d, *J* (P-C) = 5.6 Hz, *i*-Ar’N), 135.38 (d, *J* (P-C) = 2.1 Hz, *o*-Ar’NSi), 133.66 (d, *J* (P-C) = 1.6 Hz, *o*-Ar’NSi), 131.26 (d, *J* (P-C) = 1.8 Hz, *o*-Ar’N), 128.78 (s, *m*-Ar’N), 128.54 (s, *m*-Ar’NSi), 128.30 (s, *m*-Ar’N), 128.07 (s, *m*-Ar’NSi), 127.99 (s, *o*-Ar’N), 123.28 (s, *p*-Ar’N), 120.98 (s, *p*-Ar’NSi), 21.59 (s, Me-Ar’NSi), 20.40 (s, Me-Ar’N), 19.96 (s, Me-Ar’NSi), 19.91 (s, Me-Ar’N), 19.45 (d, *J* (P-C) = 21.2 Hz, PMe3), 18.64 (dd, *J* (P-C) = 25.0 Hz, *J* (P-C) = 0.8, PMe3), 31P NMR (121.4MHz, -40ºC, toluene-d8): 6.4 (d, *J* (P-P) = 9 Hz, 1, PMe3), -7.0 (d, *J* (P-P) = 9 Hz, 1, PMe3). 29Si NMR (59.6MHz, -20ºC, toluene-d8): -63.8 (1*J*(Si-H) = 98 Hz, 2*J*(Si-Me) = 7.2 Hz). C,H,N analysis (%): calcd for C24H43N2MoP2SiCl (581.045): C 49.63, H 7.46, N 4.82; found: C 48.99, H 6.92, N 4.82.

**(Ar’N)(Ar’NSiMeCl-H)Mo(PMe3)2(Cl) (8)**:

To a solution of (Ar’N)2Mo(PMe3)3 (0.326 g, 0.580 mmol) in 40 mL of ether was added HSiCl2Me (0.15 mL, 1.37 mmol). In 3-4 min the color changed from dark-green to dark-brown. The solution filtered from small amount of grey deposit and concentrated to 10 mL, 10 mL of hexane was accurately added and the mixture placed in a freezer (-30 C) overnight to give dark well-defined crystals. The cold solution was filtered off and the product dried in vacuo. Yield: 0.150 g. (0.249 mmol, 43 %).

IR (Nujol): Si-H = 1920 cm-1(weak). 1H NMR (300MHz, -10ºC, toluene-d8): 7.07 (bd, *J*(H-H) = 7.6 Hz, 1, *m*-Ar’), 6.98 (bd, *J*(H-H) = 7.5 Hz, 1, *m*-Ar’), 6.87 (vt, *J*(H-H) = 7.5 Hz, 1, *p*-Ar’), 6.87 (bs, 3, *m+p*-Ar’), 2.60 (bs, 3, Me-Ar’), 2.39 (bs, 3, Me-Ar’), 2.37 (bs, 6, Me-Ar’), 1.76 (dq, *J*(H-P) = 18 Hz, J(H-H) = 1.5 Hz, 1, MoH), 1.18 (d, *J*(P-H) = 7.4 Hz, 9, PMe3), 0.99 (d, *J*(P-H) = 8.5 Hz, 9, PMe3), 0.97 (d, *J*(H-H) = 1.5 Hz, 3, SiMe). 13C NMR (75.4 MHz, -10ºC, toluene-d8): 154.94 (d, J(P-C) = 1.8 Hz, *i*-Ar’), 154.53 (dd, J(P-C) = 1.8, 3.5 Hz, *i*-Ar’), 134.63 (s, *o*-Ar’), 128.46 (s, *m*-Ar’), 128.41 (s, *m*-Ar’), 124.27 (s, *p*-Ar’), 121.69 (s, *p*-Ar’), 21.13 (s, Me-Ar’), 20.4 (s, Me-Ar’), 19.29 (d, *J*(P-C) = 22.8 Hz, PMe3), 18.62 (d, *J*(P-C) = 25.8 Hz, PMe3), 1.83 (s, SiMe).  31P NMR (121.4MHz, -60ºC, toluene-d8): 10.2 (bd, *J*(P-P) = 6.5 Hz, 1, PMe3), 5.0 (bd, *J*(P-P) = 6.5 Hz, 1, PMe3). 29Si NMR (59.6MHz, 25ºC, C6D6): -70.1 (*J*(Si-H) = 129Hz, *J*(Si-P) = 7.2 Hz). C,H,N analysis (%): calcd for C23H40N2MoP2SiCl2 (601.353): C 45.93, H 6.70, N 4.66; found: C 46.23, H 6.93, N 4.74.

**(Ar’N)Mo(PMe3)3Cl2**:

0.2 mL (1.98 mmol) of HSiCl3 was added by syringe to 15 mL of an ether/pentane (1:2) solution of (Ar’N)2Mo(PMe3)3 (0.380 g, 0.675 mmol). Within a minute the color changed from dark-green to yellow-brown and a small of grey precipitate was formed. In 30 min the solution was filtered, cooled to -78 C and slowly concentrated in vacuo to 2 mL. The cold solution was filtered, the residue washed by 1 mL of cold pentane, and volatiles removed in an analogous fashion from the combined fractions to give a yellow-brown oil and green solid. Yield (Ar’N)Mo(PMe3)3Cl2: 0.237 g ( 0.461 mmol, 68%). The volatiles were removed from mother liquor to give 0.237 g of a yellow-brown oil, which mostly consisted of (Ar’N=SiClH)2 contaminated by (Ar’N)Mo(PMe3)3Cl2:

1H NMR (300MHz, C6D6): 6.84 (pt, *J* (H-H) = 7.35 Hz, 1, *p*- Ar’), 6.70 (d, *J* (H-H)= 7.5 Hz, 1, *m*-Ar’), 2.42 (s, 6, Me), 1.23 (d, *J* (P-H) = 7.1 Hz, 9, PMe3), 1.38 (vt, *J* (P-H) = 3.45 Hz, 18, trans PMe3), 1.24 (d, *J*(P-H) = 7.5 Hz, cis PMe3).

13C NMR (75.4MHz, C6D6): 135.2 (s, *o*-Ar’), 128.6 (s, *m*-Ar’), 125.5 (s, *p*-Ar’), 20.1 (s, Me), 22.2 (d, *J* (P-H) = 23.3 Hz, cis PMe3), 17.1 (vt, *J* (P-H) = 11.5 Hz, trans PMe3),

31P NMR (121.4MHz, C6D6): 3.69 (t, *J* (P-P) = 17.0, 1 trans P), -7.9 (d, *J* (P-P) = 17.0, 2 cis P).

C,H,N analysis (%): calcd for (514.241): C 39.71, H 7.06, N 2.72; found: C 40.70, H 6.84, N 3.28.

**[(Ar’N)SiHCl]2:**

IR (Nujol): Si-H = 2240 cm-1.

1H NMR (300MHz, C6D6): 6.82 (m, 3, m+p- Ar’), 5.44 (s+d, *J* (H-Si) = 337 Hz, 1, Si-H), 2.19 (s, 6, Me).

13C NMR (75.4MHz, C6D6): 137.4 (s, *o*-Ar’), 129.7 (s, *m*-Ar’), 127.8 (*p*-Ar’), 19.9 (s, Me).

29Si NMR (59.6MHz, C6D6): -20.9 (s).

EI-HRMS:  m/z found (calcd. for C16H20Cl2N2Si2) 366.0540 (366.0542).

**DFT calculations:**

All calculations were carried out with the Gaussian 98 program package2 (Revision A.3) using density functional theory applying Becke's 1988 non-local exchange functional3 in conjunction with Perdew's correlation functional,4 commonly aliased as BP86. The compound basis set was used for the calculation consisted of the 6-31G(d) basis set for the silicon, phosphorus, nitrogen and molybdenum-bound chlorine atoms, 6-31G for the carbon and chlorine atoms bound to silicon, and the 3-21G basis set for all other the carbon atoms and hydrogens bound to carbon. The basis set augmented by the *p-*polarization function (6-31G(d,p) basis set) was used for the hydride H atom. The Hay-Wadt VDZ effective core potentials (ECP) and the corresponding VDZ basis sets5 were used for the molybdenum atom in this model. Full geometry optimizations for all of the molecular structures were performed. Natural bond orbital analyses were performed with the Gaussian NBO 3.1 program incorporated in the Gaussian 98 package. For this purpose, the Kohn-Sham orbitals resulting from the DFT calculations were employed.

**Crystal structure determinations** f**or 7 and 8**

The crystals of **7** and **8** were grown from ether-hexane mixtures. For all compounds the crystal were mounted in a film of perfluoropolyether oil on a glass fibre abd transferred to the diffractometer Siemens three-circle diffractometer with a CCD detector (SMART system). For all structures the data were corrected for Lorentz and polarisation effects. The structures were solved by direct methods6 and refined by full-matrix least squares procedures.7 All non-hydrogen atoms were refined anisotropically. All hydrogen atoms except the hydrides (which were located from Fourier difference synthesis and positionally refined isotropically) were placed in calculated positions and refined in a "riding" model. Residual electron density was modeled as a hexane molecule of crystallization, with the restrictions put on the C-C bond lengths (1.50(2) Å).

**7**: C27H50ClMoN2P2Si, *Mr* = 624.11, monoclinic, space group P21/c, a = 18.521(4) Å, 9.849(2) Å, 18.691(4) Å,  = 106.52(3)°, V = 3268.8(11) Å3, Z = 4, calcd = 1.268 g cm-3, *R* = 0.0505, *Rw* = 0.1118.

**8**: C26H47Cl2MoN2P2Si, *Mr* = 644.53, monoclinic, space group P21/c, a = 18.403(4) Å, 9.920 (2) Å, 18.548 (4) Å,  = 105.78(3)°, V = 3258.4(11) Å3, Z = 4, calcd = 1.314 g cm-3, *R* = 0.0569, *Rw* = 0.1174.

**References**

1. U. Radius, J. Sundermeyer, H. Pritzkow, *Chem. Ber*.1994,**127**, 1827.

2. Gaussian 98, Revision A.3, Frisch, M. J.; Trucks, G. W.; Schlegel, H. B.; Scuseria, G. E.; Robb, M. A.; Cheeseman, J. R.; Zakrzewski, V. G.; Montgomery, Jr., J. A.; Stratmann, R. E.; Burant, J. C.; Dapprich, S.; Millam, J. M.; Daniels, A. D.; Kudin, K. N.; Strain, M. C.; Farkas, O.; Tomasi, J.; Barone, V.; Cossi, M.; Cammi, R.; Mennucci, B.; Pomelli, C.; Adamo, C.; Clifford, S.; Ochterski, J.; Petersson, G. A.; Ayala, P. Y.; Cui, Q.; Morokuma, K.; Malick, D. K.; Rabuck, A. D.; Raghavachari, K.; Foresman, J. B.; Cioslowski, J.; Ortiz, J. V.; Stefanov, B. B.; Liu, G.; Liashenko, A.; Piskorz, P.; Komaromi, I.; Gomperts, R.; Martin, R. L.; Fox, D. J.; Keith, T.; Al-Laham, M. A.; Peng, C. Y.; Nanayakkara, A.; Gonzalez, C.; Challacombe, M.; Gill, P. M. W.; Johnson, B.; Chen, W.; Wong, M. W.; Andres, J. L.; Gonzalez, C.; Head-Gordon, M.; Replogle, E. S.; Pople, J. A. Gaussian, Inc., Pittsburgh PA, 1998.

3. A.D. Becke, *Phys. Rev.*, 1988, **A38**, 3098.

4. B.P. Perdew, *Phys. Rev.*, 1986, **B33**, 8822.

5. P.J. Hay, W.R. Wadt, *J. Chem. Phys.,* 1985, **82**, 299.

6. (a) G. M. Sheldrick, SHELXS-86 Program for Crystal Structure Solution, *Acta Cryst*., 1990, **146**, 467; (b) A. Altomare, G. Cascarano, G. Giacovazzo, A. Guagliardi, M. C. Burla, G. Polidori, M. Camalli, *J. Appl. Crystallogr.*,1994, **27,** 435.

7. G. M. Sheldrick, SHELXTL-96, Program for Crystal Structure Refinement, Universität Göttingen.

**Table SI1.** Changes in Wiberg indices (WI) in a series (MeN)(MeNSiMe2-*n*Cl*n*-H)Mo(PMe3)2(Cl) (*n* = 0-2).

| Bond\SiR2 | SiMe2 (**9**) | SiMeCl (**10**) | SiCl2  (**11**) | SiCl2 (**11a**) |
| --- | --- | --- | --- | --- |
| Mo-Si | 0.1471 | 0.1445 | 0.1426 | 0.0368 |
| Mo-N(Si) | 0.6633 | 0.6043 | 0.5561 | 0.5170 |
| Mo-Pa | 0.6427 | 0.6703 | 0.7097 | 0.7988 |
| Mo-H | 0.2190 | 0.1888 | 0.1453 | - |
| Si-H | 0.5830 | 0.6171 | 0.6649 | 0.8720 |
| Si-N | 0.7899 | 0.8480 | 0.8842 | 0.8846 |

*a* PMe3 trans to Si-H···M

**Table SI2.** Results of the topological analysis of the electron density in the Mo(PMe3)2(NMe)2Cl(XH) complexes *a*

| X | Bond | *ρ*(**r**c),  *e* Å-3 | 2(**r**c)  *e* Å-5 | *ε*c | *H*(**r**c)  *hartree* Å-3 |
| --- | --- | --- | --- | --- | --- |
| SiCl2 | Mo-Si (ring point (3,+1)) | 0.3251 | 1.9405 | - | -0.0738 |
|  | Mo-Cl | 0.3467 | 3.8862 | 0.0789 | -0.0343 |
|  | Mo-P (*cis* P-Mo-Si-H*) | 0.4748 | 3.2417 | 0.7929 | -0.1121 |
|  | Mo-P (*trans* P-Mo-Si-H*) | 0.5465 | 3.4463 | 0.7966 | -0.1440 |
|  | Mo-N(bound to Si) | 0.6228 | 8.5204 | 0.2809 | -0.0926 |
|  | Mo-N | 1.3355 | 19.4912 | 0.0177 | -0.6758 |
|  | Mo-H* | 0.3257 | 2.3950 | 6.8799 | -0.0595 |
|  | Si-N | 0.9543 | 20.3236 | 0.1175 | -0.3811 |
|  | Si-H* | 0.7061 | 2.8831 | 0.0351 | -0.4540 |
|  | Si-Cl (*cis* Cl-Si-Mo-Cl) | 0.6126 | 1.6325 | 0.0051 | -0.3904 |
|  | Si-Cl (*trans* Cl-Si-Mo-Cl) | 0.5959 | 1.4166 | 0.0207 | -0.3777 |
| SiMeCl | Mo-Si (ring point (3,+1)) | 0.3329 | 2.1219 | - | -0.0736 |
|  | Mo-Cl | 0.3125 | 3.4628 | 0.0798 | -0.0279 |
|  | Mo-P (*cis* P-Mo-Si-H*) | 0.4719 | 3.3200 | 0.8538 | -0.1102 |
|  | Mo-P (*trans* P-Mo-Si-H*) | 0.5296 | 3.5561 | 0.8151 | -0.1348 |
|  | Mo-N(bound to Si) | 0.6608 | 8.8400 | 0.2171 | -0.1125 |
|  | Mo-N | 1.3402 | 19.4527 | 0.0206 | -0.6809 |
|  | Mo-H* | 0.3630 | 4.0862 | 2.1437 | -0.0497 |
|  | Si-N | 0.9225 | 19.1366 | 0.1128 | -0.3608 |
|  | Si-H* | 0.6584 | 2.4662 | 0.0587 | -0.4124 |
|  | Si-Cl (*cis* Cl-Si-Mo-Cl) | 0.7941 | 5.3131 | 0.0188 | -0.4792 |
|  | Si-Cl (*trans* Cl-Si-Mo-Cl) | 0.5614 | 1.2984 | 0.0222 | -0.3450 |
| SiMe2 | Mo-Si (ring point (3,+1)) | 0.3330 | 2.1217 | - | -0.0711 |
|  | Mo-Cl | 0.3076 | 3.4127 | 0.0855 | -0.0266 |
|  | Mo-P (*cis* P-Mo-Si-H*) | 0.4675 | 3.3918 | 0.8833 | -0.1077 |
|  | Mo-P (*trans* P-Mo-Si-H*) | 0.5136 | 3.6718 | 0.9188 | -0.1257 |
|  | Mo-N(bound to Si) | 0.6967 | 8.9805 | 0.1892 | -0.1334 |
|  | Mo-N | 1.3145 | 19.1712 | 0.0180 | -0.6505 |
|  | Mo-H* | 0.3939 | 4.3609 | 1.5472 | -0.0621 |
|  | Si-N | 0.8710 | 16.8048 | 0.0852 | -0.3387 |
|  | Si-H* | 0.6099 | 2.2264 | 0.0714 | -0.3682 |
|  | Si-Cl (*cis* Cl-Si-Mo-Cl) | 0.7688 | 5.5657 | 0.0334 | -0.4461 |
|  | Si-Cl (*trans* Cl-Si-Mo-Cl) | 0.7649 | 5.7129 | 0.0411 | -0.4393 |

*a* - *ρ*(**r**c) - electron density at the bond critical points; 2(**r**c) – Laplacian of electron at the bond critical points; *H*(**r**c) = *G*(**r**c)+*V*(**r**c) – sum of Lagrangian kinetic energy density and potential energy densitiy ; *ε*c – ellipticity.

**Table SI3.** Bond path angles in the Mo-H*-Si-N cycles of Mo(PMe3)2(NMe)2Cl(XH) complexe

| Angle*ab* | X = SiCl2 | X = SiMeCl | X = SiMe2 |
| --- | --- | --- | --- |
| Mo-*X*cp-H* | -127.0 | -156.0 | -166.4 |
| H*-*X*cp-Si | -177.2 | -175.8 | -175.1 |
| Si-*X*cp-N | 173.5 | 174.2 | 174.0 |
| N-*X*cp-Mo | -177.4 | -177.7 | -176.7 |

*a* – positive values – bond path is bent outward the cycle, negative – inward the cycle; *b* – *X*cp designates the position of the corresponding bond critical point.

**Fig. S1** Molecular structure of the complex **8**.
